# Supplementary material for: Prion protein N1 cleavage peptides stimulate microglial interaction with surrounding cells
Source: PubMed Central journal article supplement (PMC7171115; doi:10.1038/s41598-020-63472-z), 2020-04-20

Carroll, JA. Groveman, BR. Williams, K. Moore, R. Race, B. Haigh CL. **Prion protein N1 cleavage peptides stimulate microglial interaction with surrounding cells**

**Supplementary Data S2. Peptide QC data.** The high pressure liquid chromatography and mass spectrometry results for the peptide syntheses from Synpeptide are shown below.

### CERTIFICATE OF ANALYSIS

|                              |                                                                                                                          |
|------------------------------|--------------------------------------------------------------------------------------------------------------------------|
| <b>Product Name</b>          | PrP_N1                                                                                                                   |
| <b>Lot No</b>                | JT-68769                                                                                                                 |
| <b>Sequence</b>              | NH <sub>2</sub> -KKRPKPGGWNTGGSRYPGQSPGGNRYPPQGGTWG<br>QPHGGGWGQPHGGSWGQPHGGSWGQPHGGGWGQGGG<br>THNQWNKPSKPKTNLKHV - COOH |
| <b>Dissolution condition</b> | 15%ACN+85%H <sub>2</sub> O                                                                                               |
| <b>Length</b>                | 89AA                                                                                                                     |
| <b>Modification</b>          | N/A                                                                                                                      |
| <b>Molecular Weight (MW)</b> | 9247.01                                                                                                                  |
| <b>Storage</b>               | -20°C                                                                                                                    |

| <b>Test Items</b>          | <b>Specifications</b>                 | <b>Results</b> |
|----------------------------|---------------------------------------|----------------|
| <b>Purity by HPLC</b>      | 95%                                   | 95.13%         |
| <b>Peptide Content</b>     | N/A                                   | N/A            |
| <b>Moisture content</b>    | N/A                                   | N/A            |
| <b>Acetic acid content</b> | N/A                                   | N/A            |
| <b>Appearance</b>          | White to off-white lyophilized powder | Conforms       |
| <b>Quantity</b>            | 5-9mg                                 | 8.0mg          |

**Certified by:**  
**Quality Assurance Department**

Date 10-25-2017

**Note: this product is intended for research use only; not for diagnostic or human use.**

Carroll, JA. Groveman, BR. Williams, K. Moore, R. Race, B. Haigh CL. Prion protein N1 cleavage peptides stimulate microglial interaction with surrounding cells

### Sample Information

Order ID : Syn-68769  
 Name : PrP\_N1  
 Sequence : NH<sub>2</sub>-KKRPKPGGWNTGGSRYPGQGSPGGNRYPPQGGTGWQPHGG  
 GWGQPHGGSWGQPHGGSWGQPHGGGWGQGGGTHNQWNKPSKP  
 KTNLKHV - COOH  
 Lot No : JT-68769  
 Pump A : 0.1% Trifluoroacetic in 100% Water  
 Pump B : 0.1% Trifluoroacetic in 100% Acetontrile  
 Total Flow : 1ml/min  
 Wavelength : 220nm  
 Analytical column type : SHIMADZU Inertsil ODS-SP (4.6\*250mm\*5um)  
 Inj. Volume : 30ul

| Time  | Module | Action | Value |
|-------|--------|--------|-------|
| 0.00  | Pumps  | B.Conc | 5     |
| 25.00 | Pumps  | B.Conc | 65    |
| 25.01 | Pumps  | B.Conc | 100   |
| 30.00 | Pumps  | B.Conc | 100   |
| 30.01 | Pumps  | Stop   |       |

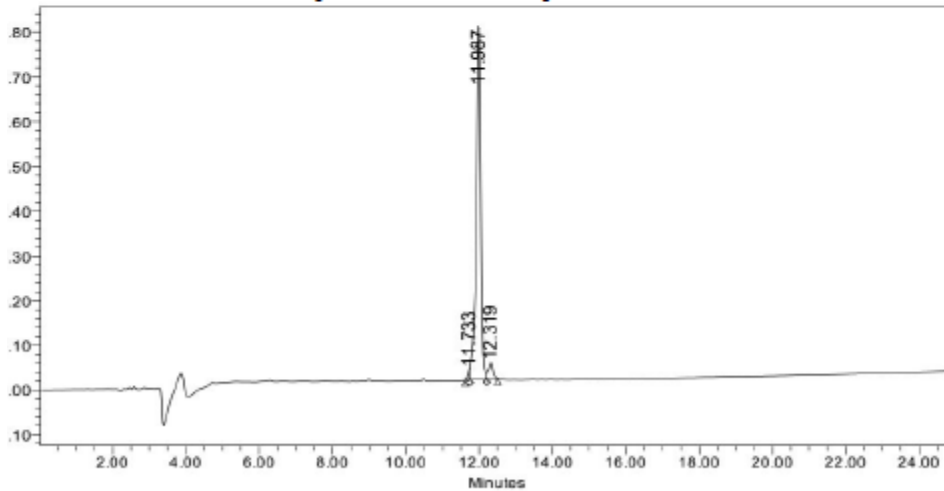

|   | RT     | Area    | % Area | Height |
|---|--------|---------|--------|--------|
| 1 | 11.733 | 53678   | 0.78   | 22737  |
| 2 | 11.987 | 6580113 | 95.13  | 786337 |
| 3 | 12.319 | 283465  | 4.10   | 34583  |

Carroll, JA. Groveman, BR. Williams, K. Moore, R. Race, B. Haigh CL. Prion protein N1 cleavage peptides stimulate microglial interaction with surrounding cells

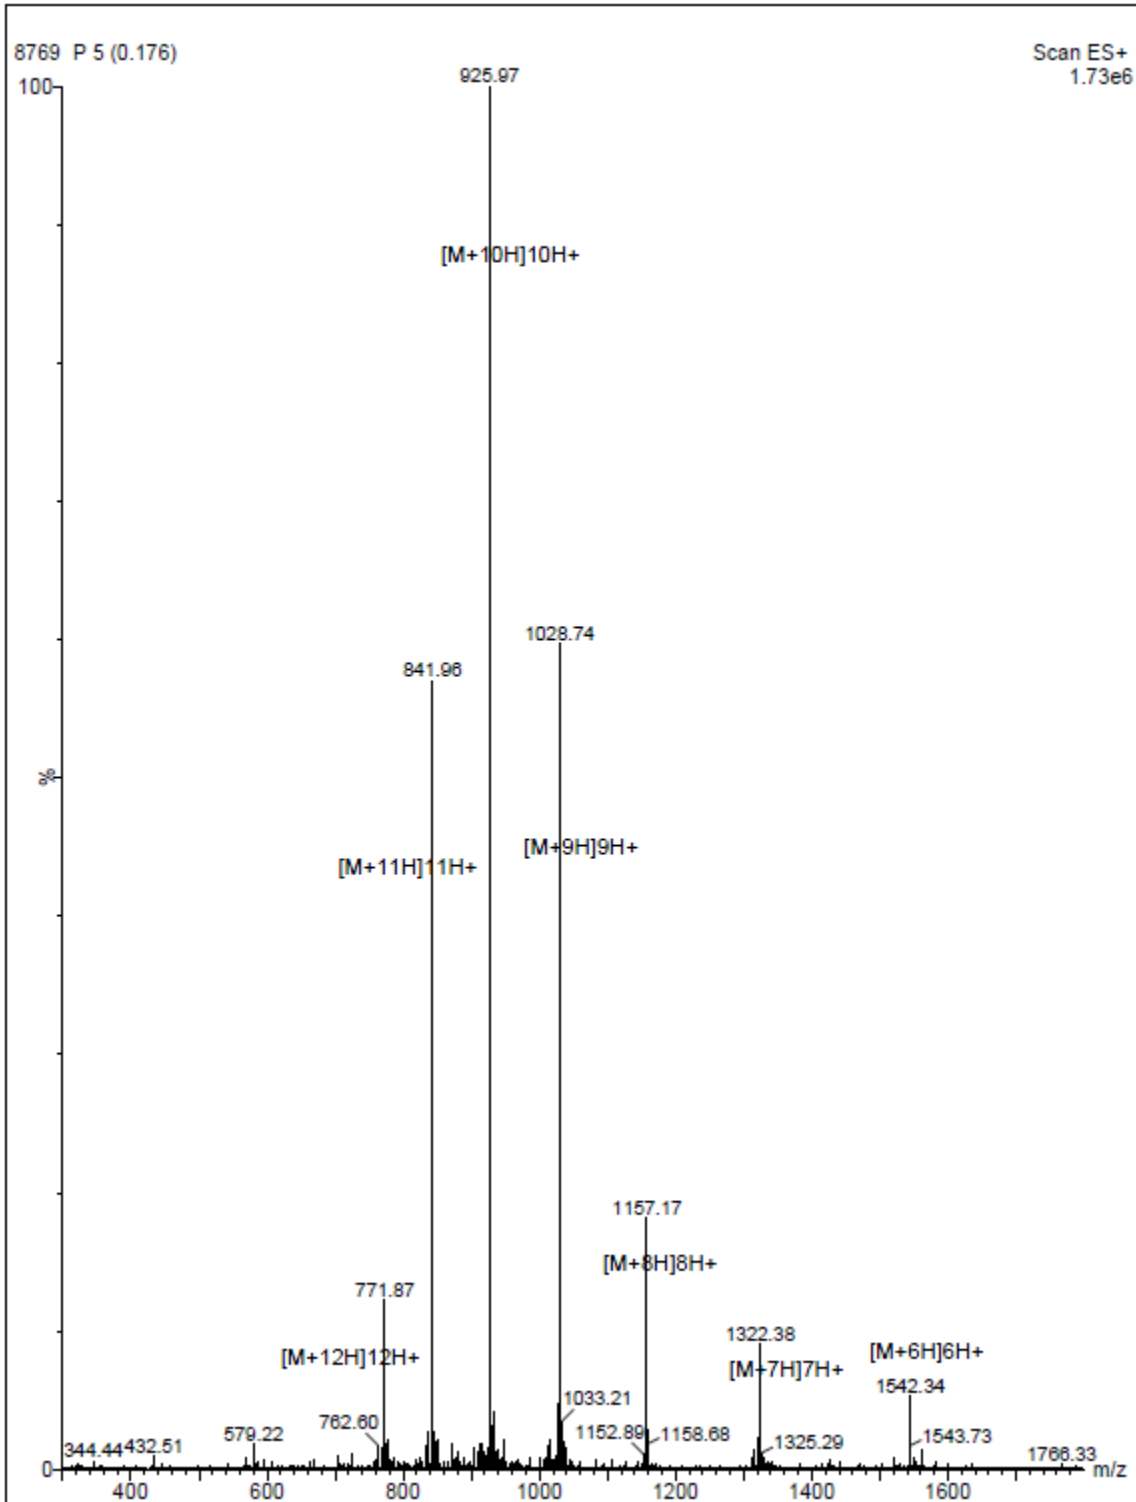

Carroll, JA. Groveman, BR. Williams, K. Moore, R. Race, B. Haigh CL. Prion protein N1 cleavage peptides stimulate microglial interaction with surrounding cells

### CERTIFICATE OF ANALYSIS

|                              |                                                                                   |
|------------------------------|-----------------------------------------------------------------------------------|
| <b>Product Name</b>          | PrP_N2                                                                            |
| <b>Lot No</b>                | JT-81096                                                                          |
| <b>Sequence</b>              | NH2-KKRPKPGGWNTGGSRYPGQGSPGGNRYPPQGGTWGQ<br>PHGGGWGQPHGGSWGQPHGGSWGQPHGGGWG- COOH |
| <b>Dissolution condition</b> | 15%ACN+85%H2O                                                                     |
| <b>Length</b>                | 67AA                                                                              |
| <b>Modification</b>          | N/A                                                                               |
| <b>Molecular Weight (MW)</b> | 6808.28                                                                           |
| <b>Storage</b>               | -20°C                                                                             |

| <b>Test Items</b>          | <b>Specifications</b>                 | <b>Results</b> |
|----------------------------|---------------------------------------|----------------|
| <b>Purity by HPLC</b>      | 95%                                   | 95.59%         |
| <b>Peptide Content</b>     | N/A                                   | N/A            |
| <b>Moisture content</b>    | N/A                                   | N/A            |
| <b>Acetic acid content</b> | N/A                                   | N/A            |
| <b>Appearance</b>          | White to off-white lyophilized powder | Conforms       |
| <b>Quantity</b>            | 7mg(5-9mg)                            | 7.0mg          |

**Certified by:**  
**Quality Assurance**  
**Department**

Date 04/26/2019

**Note: this product is intended for research use only; not for diagnostic or human use.**

Carroll, JA. Groveman, BR. Williams, K. Moore, R. Race, B. Haigh CL. Prion protein N1 cleavage peptides stimulate microglial interaction with surrounding cells

**Sample Information**

Order ID : Syn-81096  
 Name : PrP\_N2  
 Sequence : NH2-KKRPKPGGWNTGGSRYPGQSPGGNRYPPQGGTWGQPHGG  
 GWGQPHGGSWGQPHGGSWGQPHGGGWG- COOH  
 Lot No : JT-81096  
 Pump A : 0.1% Trifluoroacetic in 100% Water  
 Pump B : 0.1% Trifluoroacetic in 100% Acetonitrile  
 Total Flow : 1ml/min  
 Wavelength : 220nm  
 Analytical column type : SHIMADZU Inertsil ODS-SP (4.6\*250mm\*5um)  
 Inj. Volume : 30ul

| Time  | Module | Action | Value |
|-------|--------|--------|-------|
| 0.00  | Pumps  | B.Conc | 5     |
| 25.00 | Pumps  | B.Conc | 65    |
| 25.01 | Pumps  | B.Conc | 100   |
| 30.00 | Pumps  | B.Conc | 100   |
| 30.01 | Pumps  | Stop   |       |

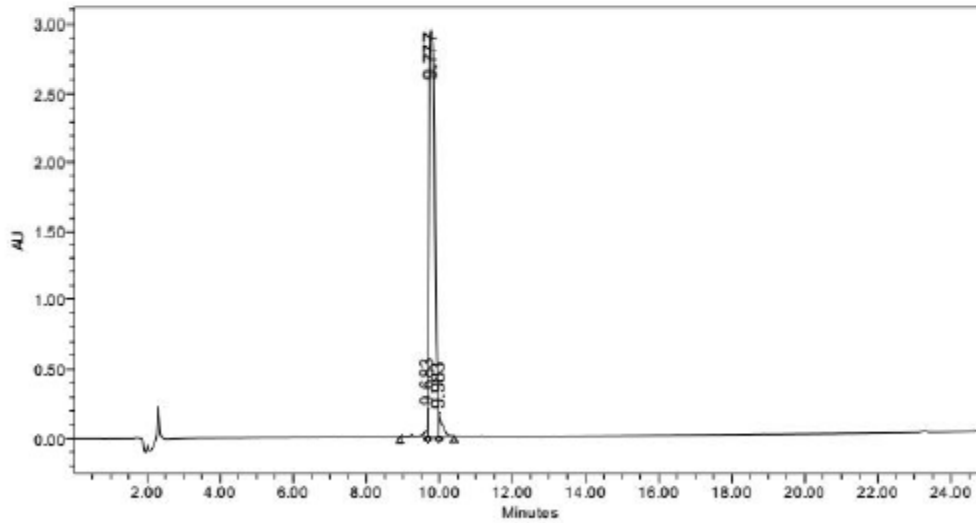

|   | RT    | Area     | % Area | Height  |
|---|-------|----------|--------|---------|
| 1 | 9.683 | 520923   | 1.54   | 196244  |
| 2 | 9.777 | 32238679 | 95.59  | 2970529 |
| 3 | 9.983 | 967058   | 2.87   | 167030  |

Carroll, JA. Groveman, BR. Williams, K. Moore, R. Race, B. Haigh CL. Prion protein N1 cleavage peptides stimulate microglial interaction with surrounding cells

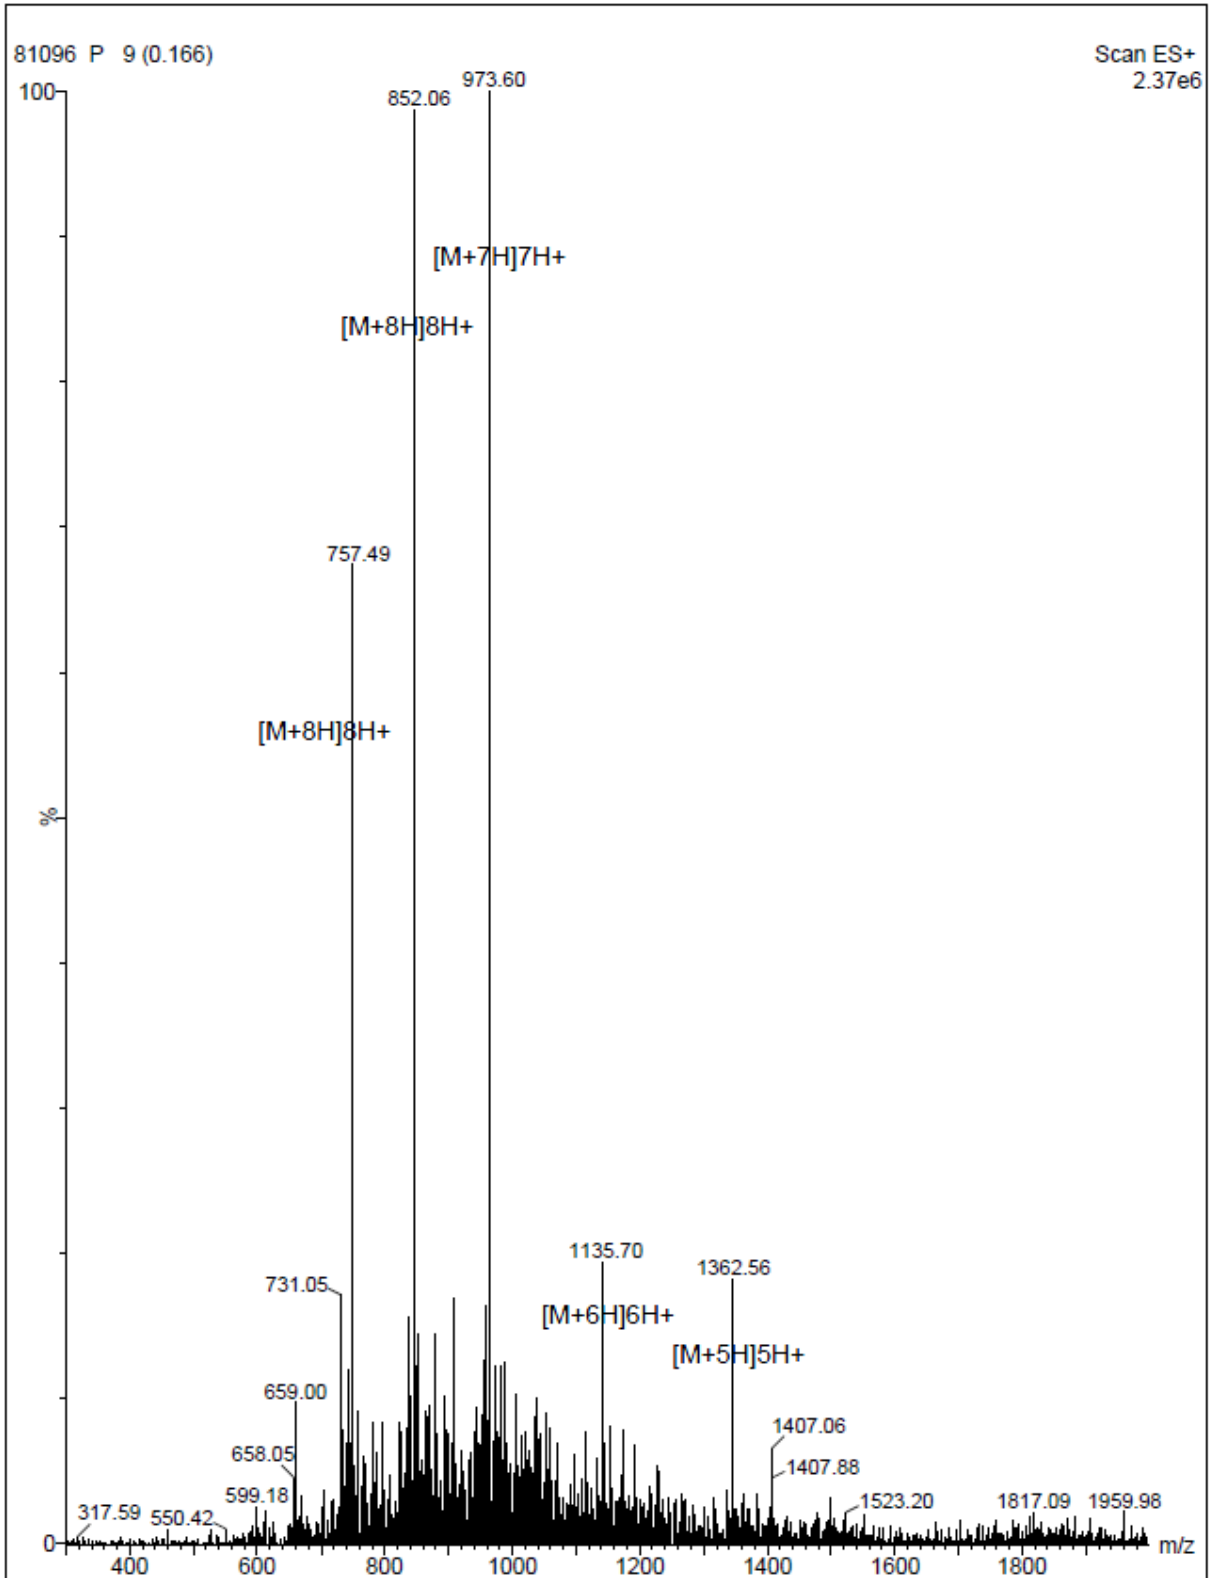

Supplement: 41598_2020_63472_MOESM2_ESM.pdf [file 41598_2020_63472_MOESM2_ESM.pdf]
