# Supplementary material for: Prion protein N1 cleavage peptides stimulate microglial interaction with surrounding cells
Source: PubMed Central journal article supplement (PMC7171115; doi:10.1038/s41598-020-63472-z), 2020-04-20
Supplement: 41598_2020_63472_MOESM6_ESM.pdf [file 41598_2020_63472_MOESM6_ESM.pdf]

**Supplementary Table S6.** Complete cytokine panel data for N1 treatments. Mean concentration (+/- standard deviation) in pg/ml and fold change (+/- standard deviation) for each cytokine analysed following treatment of MG, MNLC or MG-MNLC co-cultures with PBS (control) or N1. *n* = 4. Values determined significant by two-way ANOVA analysis (corresponding to the graphs in Figure 3) are highlighted in red. ND = not detected.

| Cytokine               | Co-cultures               |                            |                       | MNLCs                    |                           |                       | MG cells                 |                           |                       |
|------------------------|---------------------------|----------------------------|-----------------------|--------------------------|---------------------------|-----------------------|--------------------------|---------------------------|-----------------------|
|                        | Control                   | N1                         | Fold change           | Control                  | N1                        | Fold change           | Control                  | N1                        | Fold change           |
| BCA-1/CXCL13           | 713.76 (+/-173.02)        | 607.38 (+/-182.44)         | 0.84 (+/-0.12)        | 336.90 (+/-145.85)       | 286.63 (+/-86.25)         | 1.28 (+/-1.39)        | 755.4 (+/-193.40)        | 662.4 (+/-239.88)         | 0.86 (+/-0.12)        |
| <b>CTACK/CCL27</b>     | 693.34 (+/-225.99)        | 682.18 (+/-182.54)         | 1.0 (+/-0.29)         | <b>407.85 (+/-52.01)</b> | <b>198.43 (+/-120.21)</b> | <b>0.54 (+/-0.24)</b> | 710.38 (+/-127.69)       | 687.59 (+/-326.53)        | 0.97 (+/-0.45)        |
| ENA-78/CXCL5           | 47.98 (+/-21.53)          | 42.01 (+/-23.50)           | 0.84 (+/-0.17)        | 30.43 (+/-21.39)         | ND                        | ND                    | 66.25 (+/-28.20)         | 48.80 (+/-35.77)          | 0.58 (+/-0.41)        |
| EOTAXIN/CCL11          | 8.34 (+/-1.18)            | 8.23 (+/-2.13)             | 0.98 (+/-0.21)        | 4.81 (+/-0.64)           | 4.08 (+/-1.64)            | 0.83 (+/-0.21)        | 4.81 (+/-3.86)           | 8.40 (+/-5.73)            | 0.84 (+/-0.23)        |
| <b>EOTAXIN-2/CCL24</b> | 148.09 (+/-126.26)        | 385.78 (+/-279.44)         | 3.97 (+/-4.37)        | 44.47 (+/-26.98)         | 200.07 (+/-165.96)        | 5.68 (+/-4.80)        | <b>180.15 (+/-62.06)</b> | <b>418.38 (+/-279.50)</b> | <b>2.65 (+/-2.08)</b> |
| FRAXTALIN/CX3CL1       | 41.05 (+/-4.57)           | 38.89 (+/-8.07)            | 0.97 (+/-0.3063)      | 30.94 (+/-6.21)          | 25.78 (+/-6.91)           | 0.83 (+/-0.15)        | 41.63 (+/-9.65)          | 30.16 (+/-22.43)          | 0.68 (+/-0.33)        |
| GM-CSF                 | 5.67 (+/-2.34)            | 5.59 (+/-1.44)             | 1.25 (+/-0.79)        | 4.52 (+/-1.92)           | 3.84 (+/-2.12)            | 1.14 (+/-1.07)        | 6.33 (+/-2.79)           | 5.27 (+/-1.65)            | 0.92 (+/-0.34)        |
| I-309/CCL1             | 1.72 (+/-0.24963974)      | 1.57 (+/-0.33)             | 0.95 (+/-0.08)        | 0.93 (+/-0.18)           | 0.77 (+/-0.25)            | 0.94 (+/-0.30)        | 1.84 (+/-0.33)           | 1.52 (+/-0.70)            | 0.81 (+/-0.25)        |
| INF-g                  | 4.07 (+/-1.16)            | 3.07 (+/-0.75)             | 0.79 (+/-0.28)        | 2.38 (+/-0.51)           | 1.83 (+/-0.39)            | 0.80 (+/-0.26)        | 4.74 (+/-0.56)           | 3.6 (+/-1.13)             | 0.76 (+/-0.24)        |
| IL-1b                  | 24.49 (+/-1.60)           | 19.31 (+/-2.40)            | 0.28 (+/-0.48)        | ND                       | ND                        | ND                    | 23.61 (+/-9.10)          | 40.57 (+/-11.43)          | 0.73 (+/-0.96)        |
| IL-2                   | 6.00 (+/-5.29)            | 4.23 (+/-3.36)             | 0.81 (+/-0.19)        | 2.41 (+/-2.09)           | 0.69 (+/-0.34)            | 0.61 (+/-0.58)        | 6.57 (+/-5.86)           | 4.46 (+/-4.04)            | 0.74 (+/-0.25)        |
| IL-4                   | 0.81 (+/-0.26)            | 0.78 (+/-0.10)             | 1.02 (+/-0.28)        | 0.30 (+/-0.15)           | 0.30 (+/-0.11)            | 1.19 (+/-0.82)        | 0.93 (+/-0.23)           | 0.90 (+/-0.47)            | 0.91 (+/-0.29)        |
| IL-6                   | 7.76 (+/-1.57)            | 8.81 (+/-3.07)             | 1.13 (+/-0.32)        | 4.22 (+/-0.74)           | 2.43 (+/-1.40)            | 0.58 (+/-0.31)        | 12.02 (+/-5.44)          | 9.33 (+/-8.00)            | 0.69 (+/-0.26)        |
| IL-10                  | 61.28 (+/-22.52)          | 27.45 (+/-11.68)           | 0.63 (+/-0.62)        | 41.87 (+/-17.50)         | ND                        | ND                    | 69.52 (+/-8.48)          | 34.11 (+/-39.03)          | 0.44 (+/-0.67)        |
| IL-16                  | 2.23 (+/-0.43)            | 2.04 (+/-0.34)             | 0.96 (+/-0.27)        | 1.06 (+/-0.53)           | 0.88 (+/-0.32)            | 1.72 (+/-2.26)        | 2.81 (+/-0.36)           | 2.23 (+/-0.91)            | 0.78 (+/-0.28)        |
| <b>IP-10/CXCL10</b>    | <b>397.26 (+/-116.12)</b> | <b>832.23 (+/-221.19)</b>  | <b>2.24 (+/-0.82)</b> | 233.02 (+/-74.61)        | 205.21 (+/-75.89)         | 0.88 (+/-0.21)        | 321.85 (+/-113.33)       | 262.22 (+/-84.91)         | 0.82 (+/-0.04)        |
| I-TAC/CXCL11           | 151.61 (+/-48.25)         | 122.59 (+/-29.92)          | 0.83 (+/-0.17)        | 96.33 (+/-31.72)         | 67.47 (+/-37.07)          | 0.66 (+/-0.20)        | 185.89 (+/-82.80)        | 131.61 (+/-105.49)        | 0.65 (+/-0.20)        |
| KC/CXCL1               | 29.38 (+/-22.94)          | 56.22 (+/-51.87)           | 1.75 (+/-0.69)        | 6.72 (+/-6.13)           | 11.48 (+/-7.29)           | 1.31 (+/-0.39)        | 20.51 (+/-17.04)         | 23.65 (+/-29.85)          | 0.90 (+/-0.42)        |
| MCP-1/CCL2             | 400.80 (+/-137.39)        | 409.49 (+/-192.46)         | 1.08 (+/-0.37)        | 164.07 (+/-71.47)        | 110.46 (+/-23.61)         | 0.57 (+/-0.09)        | 968.00 (+/-1817.04)      | 62.80 (+/-35.40)          | 0.22 (+/-0.24)        |
| MCP-3/CCL7             | 48.56 (+/-29.42)          | 100.03 (+/-65.50)          | 2.44 (+/-2.11)        | 21.23 (+/-27.29)         | 19.85 (+/-14.21)          | 1.54 (+/-1.03)        | 108.75 (+/-236.01)       | 158.71 (+/-347.71)        | 1.08 (+/-0.34)        |
| MCP-5/CCL12            | 6.71 (+/-2.58)            | 12.34 (+/-8.59)            | 1.78 (+/-1.05)        | 2.56 (+/-1.02)           | 1.63 (+/-0.18)            | 0.76 (+/-0.27)        | 9.88 (+/-13.04)          | 22.66 (+/-40.77)          | 1.39 (+/-0.88)        |
| MDC/CCL22              | 5.85 (+/-1.44)            | 5.27 (+/-1.65)             | 0.92 (+/-0.09)        | 2.81 (+/-0.81)           | 1.47 (+/-0.96)            | 0.45 (+/-0.18)        | 7.05 (+/-1.80)           | 7.22 (+/-5.34)            | 0.96 (+/-0.45)        |
| MIP-1a/CCL3            | 734.32 (+/-590.91)        | 841.52 (+/-636.85)         | 1.22 (+/-0.17)        | 1.89 (+/-1.07)           | 1.06 (+/-0.26)            | 0.68 (+/-0.35)        | 1133.29 (+/-1058.27)     | 1266.48 (+/-1311.50)      | 1.06 (+/-0.24)        |
| <b>MIP-1b/CCL4</b>     | <b>1420.8 (+/-404.57)</b> | <b>1758.45 (+/-424.28)</b> | <b>1.26 (+/-0.16)</b> | 64.74 (+/-28.00)         | 41.52 (+/-10.19)          | 0.75 (+/-0.45)        | 1185.79 (+/-1521.34)     | 1384.19 (+/-1740.44)      | 1.06 (+/-0.35)        |
| MIP-2/CXCL2            | 99.956 (+/-51.24)         | 131.69 (+/-73.43)          | 1.30 (+/-0.48)        | 11.14 (+/-2.39)          | 7.36 (+/-1.347156264)     | 0.70 (+/-0.26)        | 228.23 (+/-124.52)       | 239.63 (+/-140.47)        | 1.05 (+/-0.18)        |
| MIP-3a/CCL20           | 23.46 (+/-10.29)          | 14.33 (+/-2.41)            | 0.69 (+/-0.02)        | 22.45 (+/-4.34)          | 15.05 (+/-3.13)           | 0.71 (+/-0.13)        | 30.74 (+/-7.58)          | 23.99 (+/-7.77)           | 0.56 (+/-0.54)        |
| MIP-3b/CCL19           | 44.96 (+/-18.97)          | 40.68 (+/-20.81)           | 0.87 (+/-0.15)        | 28.10 (+/-10.23)         | 10.38 (+/-3.36)           | 0.45 (+/-0.27)        | 55.36 (+/-26.64)         | 45.97 (+/-39.27)          | 0.79 (+/-0.32)        |
| RANTES/CCL5            | 34.30 (+/-34.29)          | 37.53 (+/-35.03)           | 1.24 (+/-0.53)        | 3.61 (+/-1.60)           | 2.55 (+/-1.64)            | 0.84 (+/-0.75)        | 25.08 (+/-17.47)         | 31.28 (+/-27.72)          | 1.15 (+/-0.38)        |
| SCYB16/CXCL16          | 26.01 (+/-12.94)          | 30.88 (+/-14.22)           | 1.25 (+/-0.20)        | 1.37 (+/-0.37)           | 0.88 (+/-0.05)            | 0.69 (+/-0.24)        | 40.52 (+/-46.64)         | 43.05 (+/-45.22)          | 1.15 (+/-0.14)        |
| SDF-1a/CXCL12          | 59.92 (+/-6.47)           | 50.74 (+/-15.68)           | 0.76 (+/-0.27)        | 28.47 (+/-11.49)         | 20.99 (+/-3.12)           | 0.62 (+/-0.18)        | 71.91 (+/-24.70)         | 70.29 (+/-38.86)          | 0.54 (+/-0.50)        |
| TARC/CCL17             | 21.82 (+/-6.31)           | 20.42 (+/-5.52)            | 0.95 (+/-0.21)        | 17.21 (+/-6.47)          | 13.21 (+/-4.06)           | 0.81 (+/-0.25)        | 26.206 (+/-4.52)         | 21.13 (+/-11.09)          | 0.80 (+/-0.39)        |
| TECK/CCL25             | 147.16 (+/- 0)            | 124.88 (+/-10.73)          | 0.85 (+/-0.07)        | 89.15 (+/-5.93)          | 57.89 (+/-13.46)          | 0.65 (+/-0.11)        | 164.06 (+/-43.09)        | 167.03 (+/-17.29)         | 0.57 (+/-0.50)        |
| TNF-a                  | 13.61 (+/-2.54)           | 6.13 (+/-3.03)             | 0.44 (+/-0.29)        | 10.78 (+/-2.95)          | 1.43 (+/-1.93)            | 0.13 (+/-0.17)        | 16.54 (+/-1.58)          | 8.07 (+/-7.29)            | 0.50 (+/-0.48)        |
